# Supplementary material for: Real-time detection of Seneca Valley virus by one-tube RPA-CRISPR/Cas12a assay
Source: Frontiers journal article supplement (doi:10.3389/fcimb.2023.1305222), 2024-01-08

Supplements. Fig.1 Detection results of the RPA-CRISPR/Cas12a method. A positive and a negative control were included.

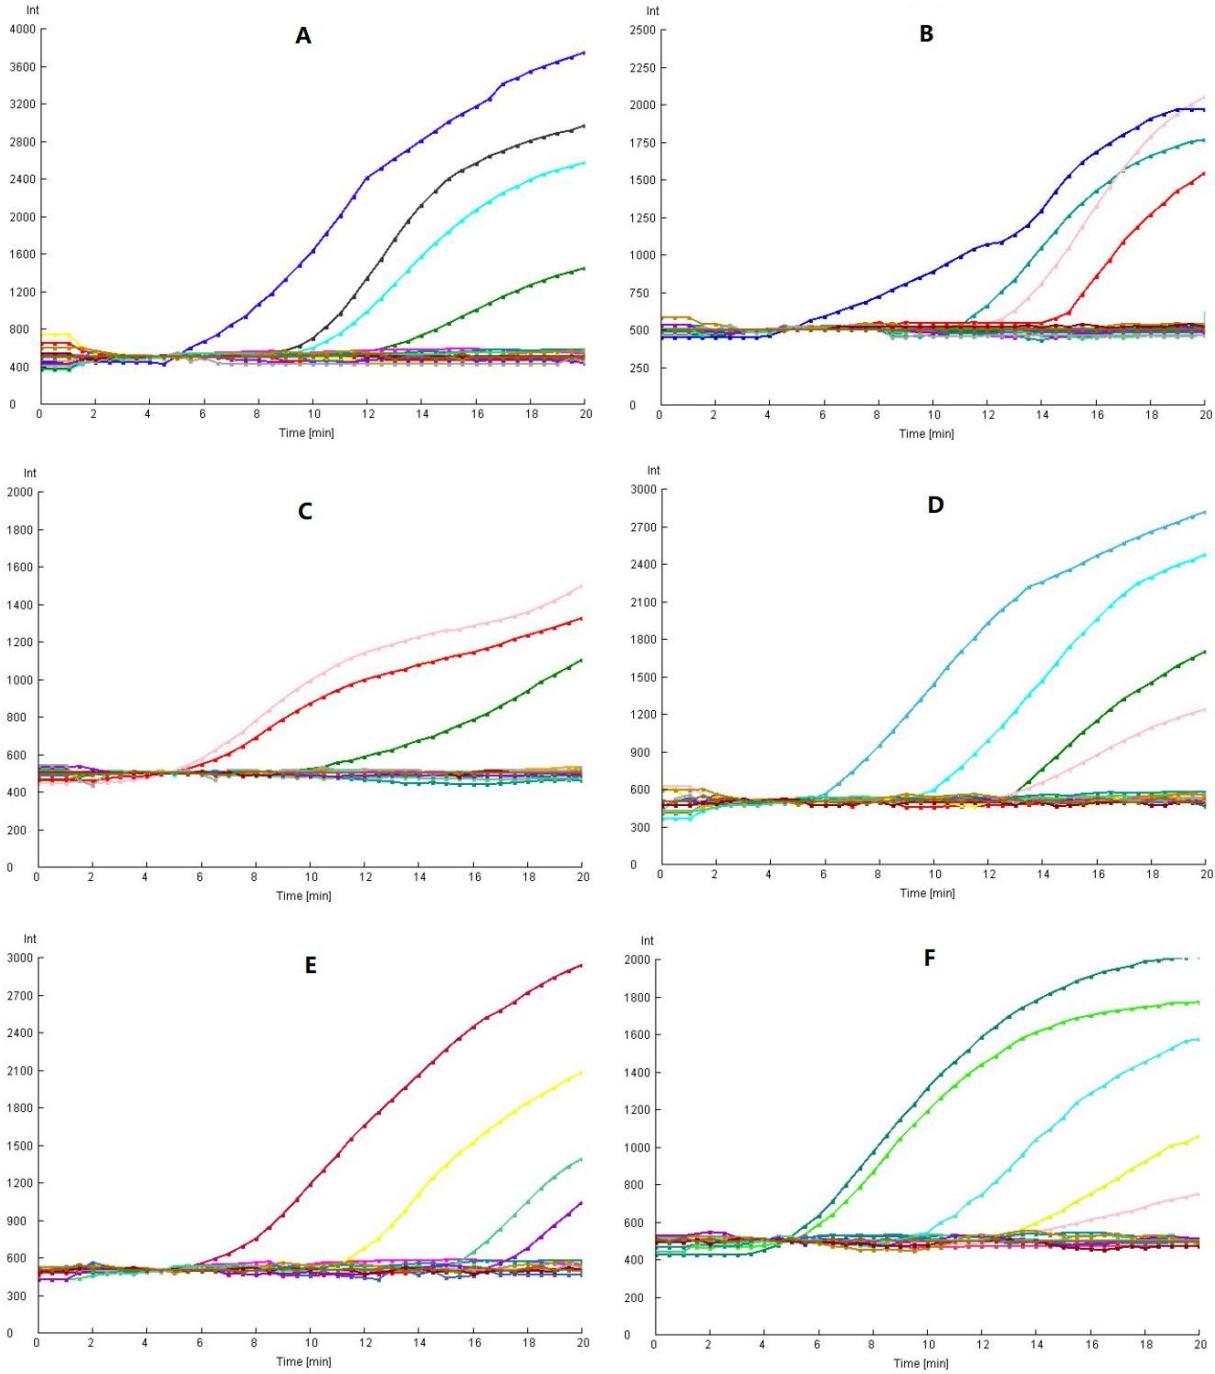

Supplements. Fig.2 Detection results of the RT-qPCR method. A positive and a negative control were included.

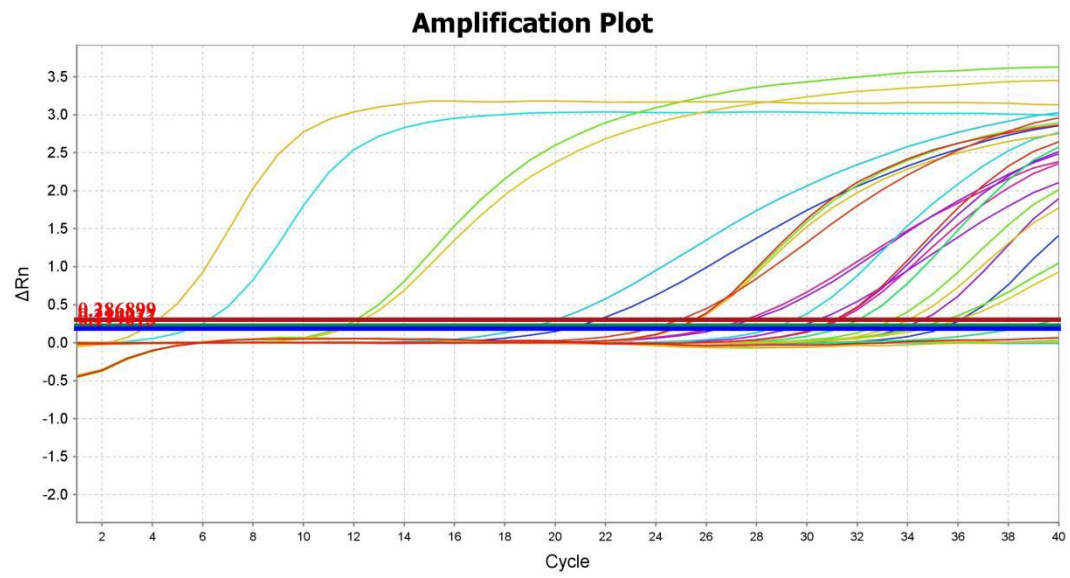

Supplement: Image_1.pdf [file Image_1.pdf]
